# Supplementary material
Source: PubMed Central journal article supplement (PMC3503466)
Supplement: Supp_Data.pdf [file Supp_Data.pdf]

## Supplementary Data

### Supplementary Methods

#### Heart hydrogen peroxide real-time measurement

For *in situ* detection of hydrogen peroxide ( $H_2O_2$ ) in the heart, experiments have been optimized based on the procedure of Duparc *et al.* (1, 2) for real-time measurement of NO release in the hypothalamus of mice with an amperometric probe. The  $H_2O_2$ -specific amperometric probe was calibrated as referred to manufacturer's instructions (ISO-HPO-100; World Precision Instruments, Aston, UK). Briefly, the probe was left in 20 ml of PBS buffer. After the sensor had stabilized, solution of  $H_2O_2$  (from 100 to 800 nM) was added in PBS. The current observed was directly proportional to  $H_2O_2$  concentration. The sensitivity of a fresh probe was at least 1 pA/nM. Probes were tested before each experiment to validate their sensitivity. Then, 1.5-month-old mice were given pentobarbital (100 mg/kg ip) and were placed on a heating plate at 37°C. The chest was opened quickly and the probe was implanted in the left ventricle, without mechanical ventilation, to monitor  $H_2O_2$  release. After 20 min of stabilization of the probe,  $H_2O_2$  concentration in the tissue was measured for 15 min in real-time with the data acquisition system LabTrax

(WPI) connected to the free radical analyzer Apollo1000 (WPI). Data were acquired and analyzed using DataTrax2 software (WPI).

#### GSH measurements

GSH content was evaluated in ventricle samples and neonatal cardiomyocytes using "Total Glutathione detection kit" from Assay Designs.

#### Supplementary References

- Duparc T, Colom A, Cani PD, Massaly N, Rastrelli S, Drougard A, Le Gonidec S, Mouldous L, Frances B, Leclercq I, Llorens-Cortes C, Pospisilik JA, Delzenne NM, Valet P, Castan-Laurell I, and Knauf C. Central apelin controls glucose homeostasis via a nitric oxide-dependent pathway in mice. *Antioxid Redox Signal* 15: 1477–1496, 2011.
- Duparc T, Naslain D, Colom A, Muccioli GG, Massaly N, Delzenne NM, Valet P, Cani PD, and Knauf C. Jejunum inflammation in obese and diabetic mice impairs enteric glucose detection and modifies nitric oxide release in the hypothalamus. *Antioxid Redox Signal* 14: 415–423, 2011.

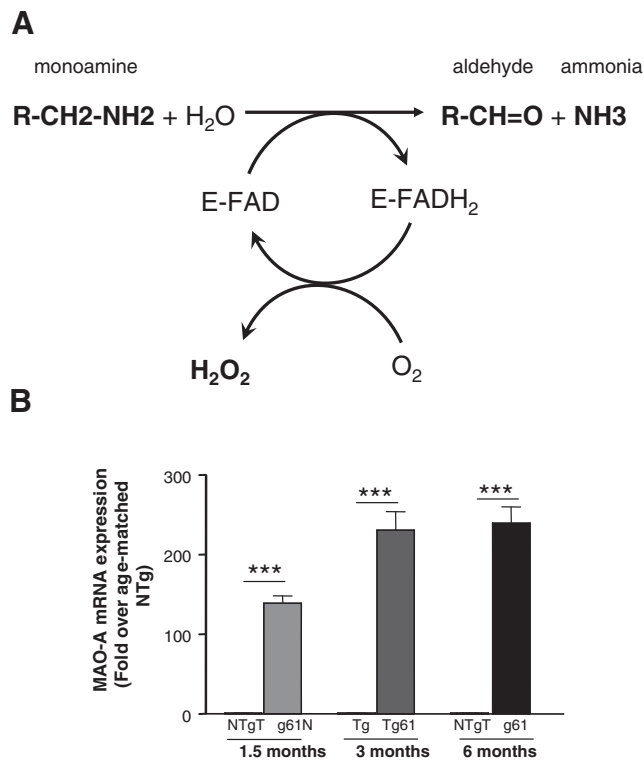

**SUPPLEMENTARY FIG. S1. Enzymatic reaction for MAO-A and mRNA expression of MAO-A in Tg mice. (A)** Oxidative deamination of monoamines by the flavoenzyme monoamine oxidase-A (MAO-A). In the first step, binding of the monoamine to the enzyme (E) yields an aldehyde and ammonia by reduction of FAD cofactor. In the second step, the oxidized form of the prosthetic group is restored by the binding of oxygen and the concomitant production of hydrogen peroxide ( $H_2O_2$ ). FAD, Flavin-Adenine-Dinucleotide. **(B)** MAO-A mRNA expression in transgenic (Tg) 61 mice at different ages. Expression was normalized to age-matched nontransgenic (NTg) mice ( $n=4$ ). \*\*\* $p < 0.001$  compared to NTg mice.

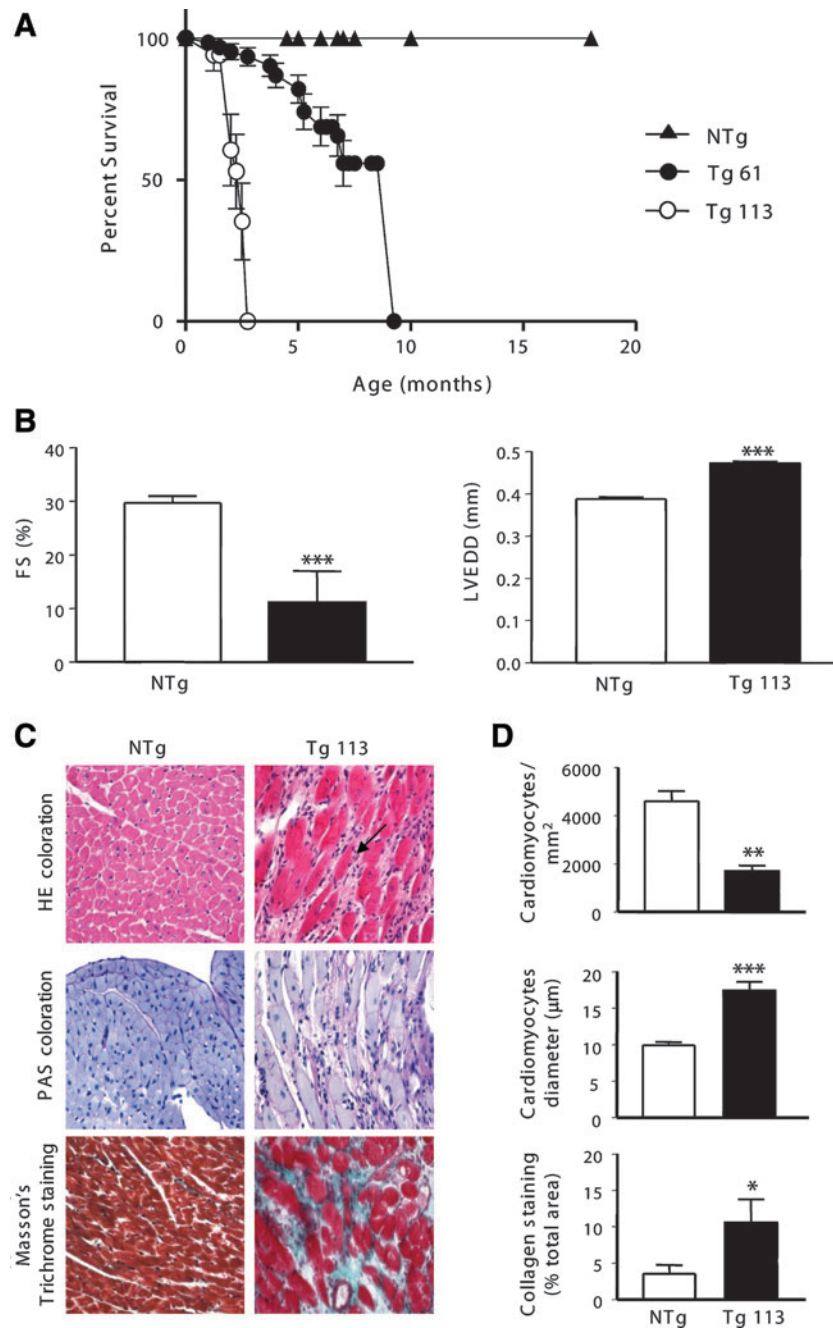

**SUPPLEMENTARY FIG. S2. Survival in MAO-A Tg mice and characterization of Tg 113 mice.** (A) MAO-A cardiac overexpression triggers mice premature death. Kaplan-Meier analysis of death with aging in NTg ( $n=26$ ), Tg 61 ( $n=38$ ), and Tg 113 mice ( $n=17$ ). (B) MAO-A Tg line 113 develops dilated cardiomyopathy and heart failure. Fractional shortening (FS) and left-ventricular diastolic diameter (LVEDD) assessment by echocardiography in 2-month-old Ntg or Tg 113 mice ( $n=2-6$ ) ( $***p < 0.001$  vs. NTg). (C) MAO-A Tg line 113 develops cardiomyocytes loss and compensative hypertrophy and fibrosis. Histological characterization ( $\times 400$ ) of ventricular pathology by hematoxylin-eosin (HE), periodic acid Schiff (PAS), and Masson's trichrome (green) staining in cardiac sections of NTg and Tg 113 at 2 months. *Arrow* indicates necrotic area. (D) Quantification of cardiomyocyte number per mm<sup>2</sup> ( $n=4$ ), cardiomyocyte diameter ( $n=4$ ), and collagen content on cardiac sections ( $n=4$ ) ( $*p < 0.05$ ,  $**p < 0.01$  or  $***p < 0.001$  vs. Ntg).

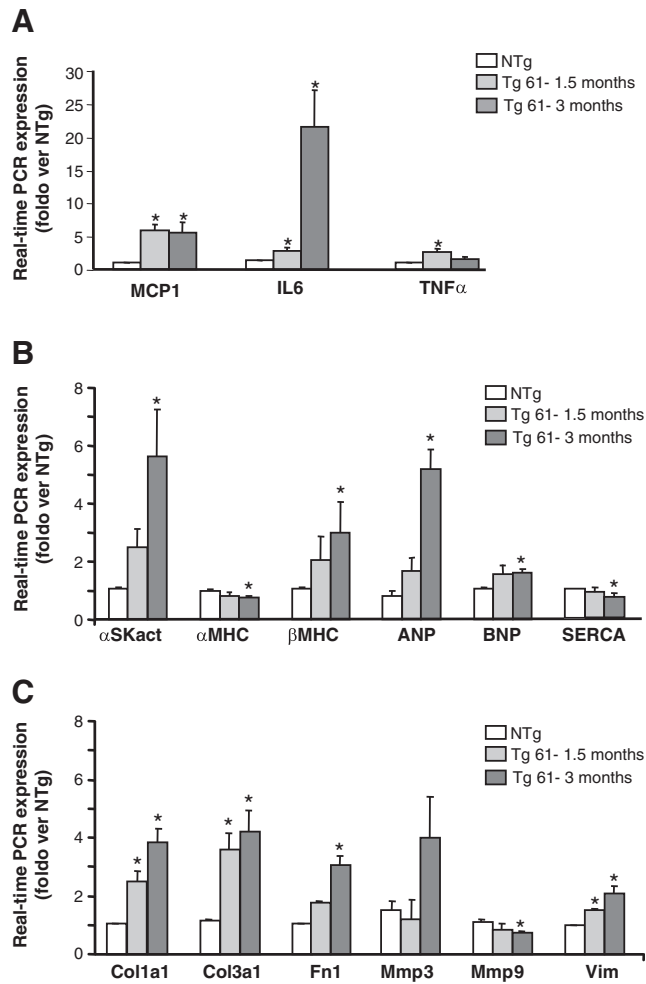

**SUPPLEMENTARY FIG. S3. Transcriptome analysis in MAO-A-overexpressing mice at the ages of 1.5 and 3 months.** Expression of genes involved in inflammation (**A**), cardiac remodelling (**B**), and cardiac fibrosis (**C**). Expression of the gene of interest is normalized to the expression of three housekeeping genes and results are expressed as fold over NTg mice ( $n=4$ ). ( $*p < 0.05$  vs. NTg). MCP1, monocyte chemoattractant protein 1 (Ccl2); IL6, interleukin 6; TNF $\alpha$ , tumor necrosis factor  $\alpha$ ;  $\alpha$ SKact, skeletal alpha actin;  $\alpha$ MHC, myosin heavy chain alpha;  $\beta$ MHC, myosin heavy chain beta; ANP, atrial natriuretic peptide; BNP, B-type natriuretic peptide; SERCA, sarco/endoplasmic reticulum calcium ATPase; Col1a1, collagen type I alpha 1; Col3a1, collagen type III alpha 1; Fn1, fibronectin 1; Mmp9, matrix metalloprotease 9; Vim, vimentin ( $*p < 0.05$  vs. NTg).

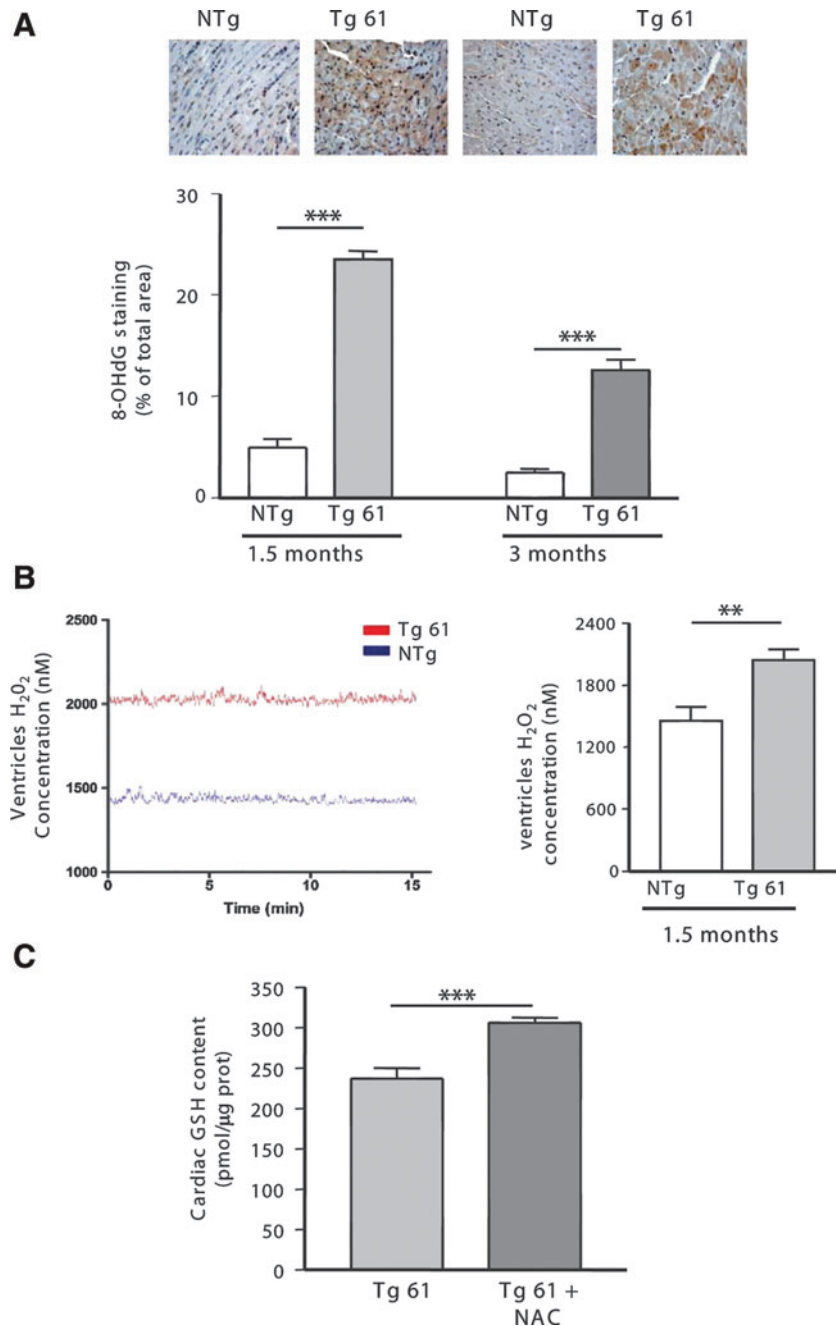

**SUPPLEMENTARY FIG. S4. Oxidative stress measurements in MAO-A Tg mice. (A)** 8-OH-dG immunohistochemistry on cardiac sections from 1.5-month-old and 3-month-old NTg and Tg 61 mice ( $\times 400$ ). Quantification of 8-OH-dG staining was expressed as percent of total area ( $n=4$ ). **(B)** Real-time *in situ* measurements of H<sub>2</sub>O<sub>2</sub> in ventricles from anesthetized Tg and NTg mice at 1.5 months. Histogram represents average H<sub>2</sub>O<sub>2</sub> concentration from  $n=5$  mice **(C)** glutathione reduced (GSH) content in ventricle extracts from 5-month-old Tg 61-untreated, and N-acetyl-cystein (NAC)-treated Tg 61 (Tg61 + NAC) mice ( $n=6$ ).  $**p < 0.01$ ,  $***p < 0.001$  vs. indicated value.

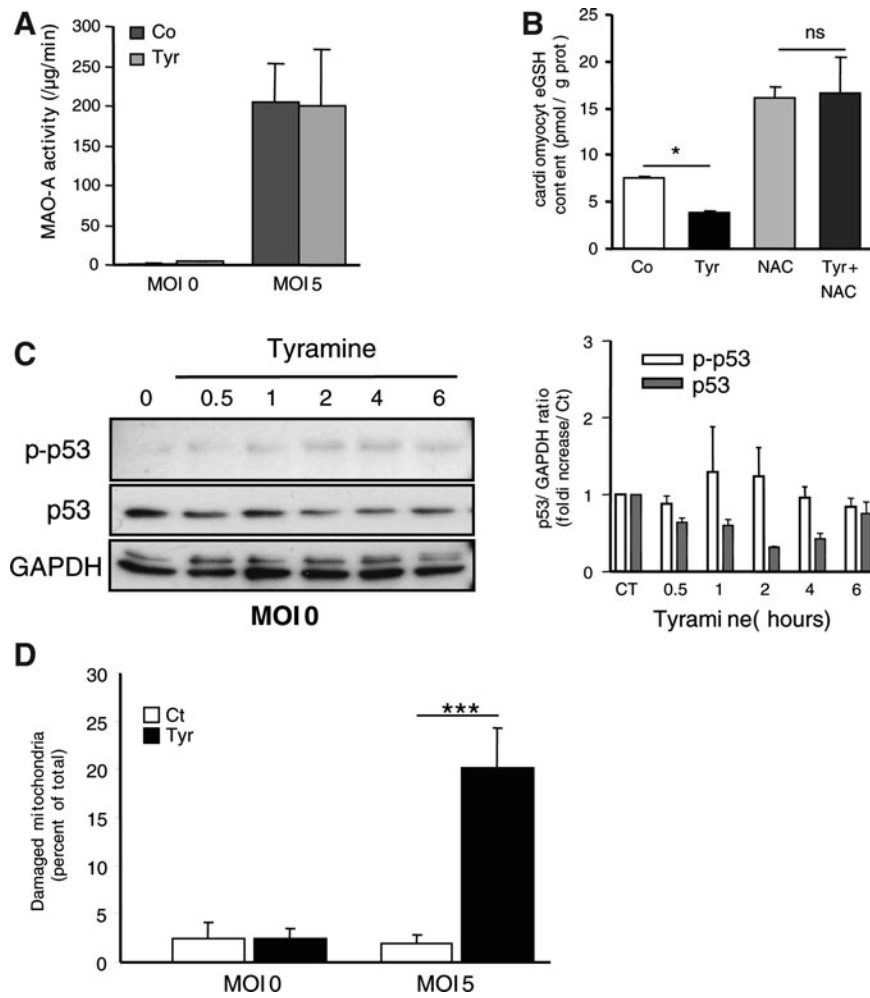

**SUPPLEMENTARY FIG. S5. MAO-A activity, GSH measurements, p53 activation, and mitochondrial damage in neonatal cardiomyocytes.** (A) Quantification of MAO-A activity by luminescence in the presence of tyramine ( $500 \mu\text{M}$ ) for 24 h in untransduced or Ade-MAO-A-transduced neonatal cardiomyocytes ( $n=3$ ). (B) GSH content in neonatal cardiomyocytes transduced with Ade-MAO-A and treated with tyramine ( $500 \mu\text{M}$ ) for 2 h in the presence of NAC ( $5 \text{mM}$ ). ( $*p < 0.05$ ,  $***p < 0.001$  vs. indicated value; ns, nonsignificant). (C) Analysis of total or phospho(ser15)-p53 and total p53 levels by immunoblot in untransduced neonatal cardiomyocytes (multiplicity of infection [MOI] 0) stimulated with  $500 \mu\text{M}$  tyramine for the indicated time ( $n=3$ ). (D) Number of damaged mitochondria expressed as percent of total mitochondria in untransduced or ade-MAO-A-transduced cardiomyocytes treated with tyramine for 4 h.

SUPPLEMENTARY TABLE S1. UPREGULATED GENES ENCODING MITOCHONDRIAL PROTEINS

| <i>Symbol</i> | <i>Protein name</i>                                                                    | <i>Accession number</i> | <i>Fold over NTg</i> | <i>p-value</i> |
|---------------|----------------------------------------------------------------------------------------|-------------------------|----------------------|----------------|
| TSPO          | Translocator protein (18 kDa)                                                          | P222657                 | 2.26                 | 7.30E-09       |
| HCLS1         | Hematopoietic cell-specific Lyn substrate 1                                            | P297679                 | 2.22                 | 5.70E-07       |
| MTCH1         | Mitochondrial carrier homolog 1 ( <i>C. elegans</i> )                                  | P458242                 | 2.19                 | 1.13E-04       |
| UCP2          | Uncoupling protein 2 (mitochondrial, proton carrier)                                   | P297105                 | 2.07                 | 2.58E-05       |
| CYBB          | Cytochrome b-245, beta polypeptide                                                     | P444628                 | 1.99                 | 6.30E-08       |
| RAB32         | RAB32, member RAS oncogene family                                                      | P293688                 | 1.97                 | 4.69E-08       |
| SLC25A45      | Solute carrier family 25, member 45                                                    | P349727                 | 1.92                 | 1.64E-07       |
| GPRC5C        | G protein-coupled receptor, family C, group 5, member C                                | P309988                 | 1.85                 | 4.54E-06       |
| ASS1          | Argininosuccinate synthetase 1                                                         | P361165                 | 1.85                 | 1.77E-06       |
| GPX1          | Glutathione peroxidase 1                                                               | P684378                 | 1.78                 | 1.59E-06       |
| SLC25A1       | Solute carrier family 25 (mitochondrial carrier; citrate transporter), member 1        | P350922                 | 1.77                 | 1.79E-06       |
| GRN           | Granulin                                                                               | P192800                 | 1.75                 | 3.94E-05       |
| PISD          | Phosphatidylserine decarboxylase                                                       | P422338                 | 1.69                 | 3.28E-05       |
| VARS          | Valyl-tRNA synthetase                                                                  | P203501                 | 1.69                 | 1.12E-04       |
| PRELID1       | PRELI domain containing 1                                                              | P505337                 | 1.67                 | 3.15E-06       |
| SARDH         | Sarcosine dehydrogenase                                                                | P492676                 | 1.67                 | 1.31E-04       |
| CPT1C         | Carnitine palmitoyltransferase 1C                                                      | P269942                 | 1.64                 | 9.29E-07       |
| RNASEL        | Ribonuclease L (2',5'-oligoadenylate synthetase-dependent)                             | P377760                 | 1.62                 | 9.56E-07       |
| PRDX4         | Peroxiredoxin 4                                                                        | P200819                 | 1.62                 | 1.61E-06       |
| HK1           | Hexokinase 1                                                                           | P479599                 | 1.60                 | 2.66E-03       |
| CKB           | Creatine kinase, brain                                                                 | P425772                 | 1.57                 | 1.56E-03       |
| SFXN1         | Sideroflexin 1                                                                         | P418526                 | 1.55                 | 2.90E-07       |
| PYCR1         | Pyrroline-5-carboxylate reductase 1                                                    | P503896                 | 1.54                 | 2.48E-05       |
| TK2           | Thymidine kinase 2, mitochondrial                                                      | P310398                 | 1.50                 | 7.31E-05       |
| CYB5R3        | Cytochrome b5 reductase 3                                                              | P153170                 | 1.48                 | 1.19E-03       |
| CYBA          | Cytochrome b-245, alpha polypeptide                                                    | P131800                 | 1.47                 | 1.92E-03       |
| SLC25A10      | Solute carrier family 25 (mitochondrial carrier; dicarboxylate transporter), member 10 | P404904                 | 1.43                 | 1.39E-03       |
| STAR          | Steroidogenic acute regulatory protein                                                 | P274436                 | 1.42                 | 3.04E-04       |

NTg, nontransgenic.

SUPPLEMENTARY TABLE S2. DOWNREGULATED GENES ENCODING MITOCHONDRIAL PROTEINS

| <i>Symbol</i> | <i>Protein name</i>                                                               | <i>Accession number</i> | <i>Fold over NTg</i> | <i>p-value</i> |
|---------------|-----------------------------------------------------------------------------------|-------------------------|----------------------|----------------|
| MRPS33        | Mitochondrial ribosomal protein S33                                               | P342896                 | 0.37                 | 1.29E-06       |
| LAP3          | Leucine aminopeptidase 3                                                          | P431662                 | 0.38                 | 8.45E-06       |
| MRPS18C       | Mitochondrial ribosomal protein S18C                                              | P108484                 | 0.39                 | 1.99E-07       |
| MRPL1         | Mitochondrial ribosomal protein L1                                                | P86073                  | 0.39                 | 7.22E-08       |
| PITRM1        | Pitrilysin metallopeptidase 1                                                     | P474960                 | 0.39                 | 9.45E-07       |
| PPM1K         | Protein phosphatase 1K (PP2C domain containing)                                   | P265219                 | 0.40                 | 2.52E-07       |
| PDK4          | Pyruvate dehydrogenase kinase, isozyme 4                                          | P350453                 | 0.40                 | 8.20E-05       |
| DBT           | Dihydrolipoamide branched chain transacylase E2                                   | P569348                 | 0.42                 | 3.90E-08       |
| SH3GLB1       | SH3-domain GRB2-like endophilin B1                                                | P32249                  | 0.43                 | 6.40E-06       |
| MLYCD         | Malonyl-CoA decarboxylase                                                         | P222283                 | 0.43                 | 9.04E-09       |
| MCEE          | Methylmalonyl CoA epimerase                                                       | P320481                 | 0.43                 | 2.07E-06       |
| TFB2M         | Transcription factor B2, mitochondrial                                            | P374499                 | 0.45                 | 1.52E-05       |
| UCP3          | Uncoupling protein 3 (mitochondrial, proton carrier)                              | P380379                 | 0.45                 | 1.25E-04       |
| ND4L          | NADH dehydrogenase, subunit 4L (complex I)                                        | P245525                 | 0.45                 | 7.44E-05       |
| MAOB          | Monoamine oxidase B                                                               | P302566                 | 0.48                 | 1.00E-05       |
| COX16         | COX16 cytochrome c oxidase assembly homolog ( <i>S. cerevisiae</i> )              | P404300                 | 0.49                 | 1.07E-06       |
| ATP5F1        | ATP synthase, H <sup>+</sup> transporting, mitochondrial F0 complex, subunit B1   | P106929                 | 0.50                 | 6.53E-04       |
| MRPL47        | Mitochondrial ribosomal protein L47                                               | P302291                 | 0.50                 | 7.80E-09       |
| MRPS35        | Mitochondrial ribosomal protein S35                                               | P110841                 | 0.51                 | 7.67E-09       |
| CPOX          | Coproporphyrinogen oxidase                                                        | P257258                 | 0.51                 | 3.10E-05       |
| HSDL2         | Hydroxysteroid dehydrogenase like 2                                               | P281930                 | 0.51                 | 1.24E-07       |
| MRPS25        | Mitochondrial ribosomal protein S25                                               | P121325                 | 0.51                 | 2.63E-07       |
| ACSS1         | Acyl-CoA synthetase short-chain family member 1                                   | P479321                 | 0.51                 | 1.67E-06       |
| PINK1         | PTEN induced putative kinase 1                                                    | P196605                 | 0.51                 | 7.29E-07       |
| C5ORF33       | Chromosome 5 open reading frame 33                                                | P243323                 | 0.52                 | 1.13E-06       |
| DECR1         | 2,4-dienoyl CoA reductase 1, mitochondrial                                        | P208555                 | 0.52                 | 1.57E-06       |
| CHCHD3        | Coiled-coil-helix-coiled-coil-helix domain containing 3                           | P526335                 | 0.52                 | 8.93E-04       |
| MTFR1         | Mitochondrial fission regulator 1                                                 | P143002                 | 0.55                 | 9.63E-07       |
| MRPS22        | Mitochondrial ribosomal protein S22                                               | P362903                 | 0.55                 | 6.63E-06       |
| SLC25A46      | Solute carrier family 25, member 46                                               | P176711                 | 0.55                 | 1.14E-05       |
| MRS2          | MRS2 magnesium homeostasis factor homolog ( <i>S. cerevisiae</i> )                | P618187                 | 0.55                 | 5.91E-06       |
| AUH           | AU RNA binding protein/enoyl-Coenzyme A hydratase                                 | P372473                 | 0.55                 | 9.13E-07       |
| NDUFB11       | NADH dehydrogenase (ubiquinone) 1 beta subcomplex, 11, 17.3kDa                    | P205573                 | 0.55                 | 5.04E-05       |
| DARS2         | Aspartyl-tRNA synthetase 2, mitochondrial                                         | P102559                 | 0.55                 | 1.06E-08       |
| SLC25A36      | Solute carrier family 25, member 36                                               | P124121                 | 0.56                 | 1.83E-04       |
| PDHA1         | Pyruvate dehydrogenase (lipoamide) alpha 1                                        | P581435                 | 0.56                 | 6.01E-06       |
| COQ7          | Coenzyme Q7 homolog, ubiquinone (yeast)                                           | P161691                 | 0.56                 | 1.39E-07       |
| NNT           | Nicotinamide nucleotide transhydrogenase                                          | P113395                 | 0.56                 | 4.98E-06       |
| MARCH5        | Membrane-associated ring finger (C3HC4) 5                                         | P405668                 | 0.56                 | 2.00E-07       |
| COX7A2        | Cytochrome c oxidase subunit VIIa polypeptide 2 (liver)                           | P319031                 | 0.56                 | 2.50E-05       |
| NDUFA6        | NADH dehydrogenase (ubiquinone) 1 alpha subcomplex, 6, 14kDa                      | P217474                 | 0.57                 | 2.89E-07       |
| PDHX          | Pyruvate dehydrogenase complex, component X                                       | P149946                 | 0.57                 | 1.34E-04       |
| MFN1          | Mitofusin 1                                                                       | P2732                   | 0.57                 | 5.50E-08       |
| ADH5          | Alcohol dehydrogenase 5 (class III), chi polypeptide                              | P404275                 | 0.57                 | 3.60E-06       |
| YARS2         | Tyrosyl-tRNA synthetase 2, mitochondrial                                          | P373609                 | 0.58                 | 4.37E-07       |
| MUT           | Methylmalonyl Coenzyme A mutase                                                   | P633163                 | 0.58                 | 7.62E-06       |
| MRPS21        | Mitochondrial ribosomal protein S21                                               | P509012                 | 0.58                 | 1.96E-06       |
| NDUFS6        | NADH dehydrogenase (ubiquinone) Fe-S protein 6, 13kDa (NADH-coenzyme Q reductase) | P335077                 | 0.58                 | 4.48E-08       |
| SLC25A11      | Solute carrier family 25 (mitochondrial carrier; oxoglutarate carrier), member 11 | P267454                 | 0.58                 | 7.32E-06       |
| TOMM7         | Translocase of outer mitochondrial membrane 7 homolog (yeast)                     | P206547                 | 0.58                 | 5.44E-05       |
| COX15         | COX15 homolog, cytochrome c oxidase assembly protein (yeast)                      | P354744                 | 0.58                 | 6.47E-04       |
| TIMM8A        | Translocase of inner mitochondrial membrane 8 homolog A (yeast)                   | P373043                 | 0.59                 | 4.87E-07       |
| DUT           | Deoxyuridine triphosphatase                                                       | P480360                 | 0.59                 | 8.03E-04       |
| LYPLA1        | Lysophospholipase I                                                               | P8227                   | 0.59                 | 3.20E-05       |
| MRPL22        | Mitochondrial ribosomal protein L22                                               | P322994                 | 0.59                 | 9.60E-07       |
| CLPX          | ClpX caseinolytic peptidase X homolog ( <i>E. coli</i> )                          | P304683                 | 0.59                 | 3.40E-05       |
| MTERFD3       | MTERF domain containing 3                                                         | P202623                 | 0.60                 | 2.05E-05       |
| NDUFA8        | NADH dehydrogenase (ubiquinone) 1 alpha subcomplex, 8, 19kDa                      | P475501                 | 0.60                 | 3.78E-03       |
| PHB           | Prohibitin                                                                        | P165934                 | 0.60                 | 6.26E-06       |

(continued)

SUPPLEMENTARY TABLE S2. (CONTINUED)

| <i>Symbol</i> | <i>Protein name</i>                                                                         | <i>Accession number</i> | <i>Fold over NTg</i> | <i>p-value</i> |
|---------------|---------------------------------------------------------------------------------------------|-------------------------|----------------------|----------------|
| KIAA0564      | KIAA0564                                                                                    | P221144                 | 0.60                 | 1.07E-04       |
| SUCLA2        | Succinate-CoA ligase, ADP-forming, beta subunit                                             | P111554                 | 0.60                 | 5.00E-05       |
| FECH          | Ferrochelatase (protoporphyrin)                                                             | P266763                 | 0.60                 | 2.51E-04       |
| NDUFA12       | NADH dehydrogenase (ubiquinone) 1 alpha subcomplex, 12                                      | P458540                 | 0.60                 | 1.73E-04       |
| COX7B         | Cytochrome c oxidase subunit VIIb                                                           | P160664                 | 0.61                 | 1.11E-05       |
| MRPL19        | Mitochondrial ribosomal protein L19                                                         | P604526                 | 0.61                 | 4.45E-07       |
| ADHFE1        | Alcohol dehydrogenase, iron containing, 1                                                   | P116264                 | 0.61                 | 1.08E-04       |
| UQCRH         | Ubiquinol-cytochrome c reductase hinge protein                                              | P350301                 | 0.61                 | 4.20E-05       |
| ATP5G3        | ATP synthase, H <sup>+</sup> transporting, mitochondrial F0 complex, subunit C3 (subunit 9) | P294849                 | 0.61                 | 5.88E-06       |
| MTERFD1       | MTERF domain containing 1                                                                   | P507204                 | 0.62                 | 3.94E-04       |
| SYNJ2BP       | Synaptojanin 2 binding protein                                                              | P662001                 | 0.62                 | 5.12E-04       |
| ACOT2         | Acyl-CoA thioesterase 2                                                                     | P525183                 | 0.62                 | 2.53E-04       |
| SLC25A37      | Solute carrier family 25, member 37                                                         | P343429                 | 0.62                 | 4.87E-04       |
| ATP5S         | ATP synthase, H <sup>+</sup> transporting, mitochondrial F0 complex, subunit s (factor B)   | P195798                 | 0.62                 | 1.28E-06       |
| RAB11FIP5     | RAB11 family interacting protein 5 (class I)                                                | P529360                 | 0.62                 | 2.83E-05       |
| OXCT1         | 3-oxoacid CoA transferase 1                                                                 | P107321                 | 0.62                 | 7.76E-07       |
| SDHA          | Succinate dehydrogenase complex, subunit A, flavoprotein (Fp)                               | P458708                 | 0.62                 | 3.51E-03       |
| COX7A2L       | Cytochrome c oxidase subunit VIIa polypeptide 2 like                                        | P434803                 | 0.62                 | 2.19E-06       |
| L2HGDH        | L-2-hydroxyglutarate dehydrogenase                                                          | P221132                 | 0.62                 | 2.57E-05       |
| ETFDH         | Electron-transferring-flavoprotein dehydrogenase                                            | P161574                 | 0.62                 | 2.21E-04       |
| SLC25A26      | Solute carrier family 25, member 26                                                         | P71544                  | 0.62                 | 1.35E-06       |
| TOMM20        | Translocase of outer mitochondrial membrane 20 homolog (yeast)                              | P310930                 | 0.62                 | 1.82E-07       |
| C18ORF55      | Chromosome 18 open reading frame 55                                                         | P395842                 | 0.62                 | 5.85E-06       |
| YWHAZ         | Tyrosine 3-monooxygenase/tryptophan 5-monooxygenase activation protein, zeta polypeptide    | P480709                 | 0.63                 | 1.65E-03       |
| ACSL1         | Acyl-CoA synthetase long-chain family member 1                                              | P496432                 | 0.63                 | 9.37E-05       |
| PTPMT1        | Protein tyrosine phosphatase, mitochondrial 1                                               | P226341                 | 0.63                 | 4.09E-08       |
| SLC25A16      | Solute carrier family 25 (mitochondrial carrier; Graves disease autoantigen), member 16     | P458870                 | 0.63                 | 6.08E-06       |
| MRPL50        | Mitochondrial ribosomal protein L50                                                         | P112677                 | 0.63                 | 2.35E-05       |
| DLAT          | Dihydrolipoamide S-acetyltransferase                                                        | P265106                 | 0.63                 | 2.05E-05       |
| MCAT          | Malonyl CoA:ACP acyltransferase (mitochondrial)                                             | P314855                 | 0.63                 | 3.36E-05       |
| AFG3L1        | AFG3 ATPase family gene 3-like 1 ( <i>S. cerevisiae</i> )                                   | P598714                 | 0.64                 | 4.11E-04       |
| OGG1          | 8-oxoguanine DNA glycosylase                                                                | P489903                 | 0.64                 | 2.16E-03       |
| ACSL6         | Acyl-CoA synthetase long-chain family member 6                                              | P380699                 | 0.64                 | 9.22E-04       |
| SSBP1         | Single-stranded DNA binding protein 1                                                       | P289685                 | 0.64                 | 4.11E-05       |
| PPP1CC        | Protein phosphatase 1, catalytic subunit, gamma isoform                                     | P519508                 | 0.65                 | 1.08E-04       |
| NDUFV3        | NADH dehydrogenase (ubiquinone) flavoprotein 3, 10kDa                                       | P170054                 | 0.65                 | 9.40E-06       |
| OXSM          | 3-oxoacyl-ACP synthase, mitochondrial                                                       | P312748                 | 0.65                 | 2.31E-05       |
| SLC25A12      | Solute carrier family 25 (mitochondrial carrier, Aralar), member 12                         | P1196751                | 0.65                 | 1.32E-03       |
| MTRF1L        | Mitochondrial translational release factor 1-like                                           | P397548                 | 0.65                 | 2.98E-08       |
| MRPL40        | Mitochondrial ribosomal protein L40                                                         | P420627                 | 0.65                 | 4.15E-05       |
| REEP1         | Receptor accessory protein 1                                                                | P508341                 | 0.66                 | 2.29E-06       |
| SUOX          | Sulfite oxidase                                                                             | P249360                 | 0.66                 | 1.20E-04       |
| IMMP1L        | IMP1 inner mitochondrial membrane peptidase-like ( <i>S. cerevisiae</i> )                   | P3754                   | 0.66                 | 1.30E-04       |
| PACS2         | Phosphofurin acidic cluster sorting protein 2                                               | P439520                 | 0.66                 | 6.59E-07       |
| MTIF2         | Mitochondrial translational initiation factor 2                                             | P455597                 | 0.66                 | 3.67E-05       |
| TOMM22        | Translocase of outer mitochondrial membrane 22 homolog (yeast)                              | P105339                 | 0.66                 | 1.86E-06       |
| COX11         | COX11 homolog, cytochrome c oxidase assembly protein (yeast)                                | P214319                 | 0.66                 | 3.00E-06       |
| MRPL18        | Mitochondrial ribosomal protein L18                                                         | P210474                 | 0.66                 | 1.09E-03       |
| CPT1B         | Carnitine palmitoyltransferase 1B (muscle)                                                  | P232913                 | 0.66                 | 2.28E-04       |
| MCCC1         | Methylcrotonoyl-Coenzyme A carboxylase 1 (alpha)                                            | P282975                 | 0.66                 | 3.81E-05       |
| ACOT13        | Acyl-CoA thioesterase 13                                                                    | P502422                 | 0.67                 | 8.22E-06       |
| ATP5B         | ATP synthase, H <sup>+</sup> transporting, mitochondrial F1 complex, beta polypeptide       | P328078                 | 0.67                 | 2.13E-04       |
| NDUFA4        | NADH dehydrogenase (ubiquinone) 1 alpha subcomplex, 4, 9kDa                                 | P552832                 | 0.67                 | 1.53E-05       |
| CAPRIN2       | Caprin family member 2                                                                      | P204944                 | 0.67                 | 4.57E-05       |
| MMADHC        | methylmalonic aciduria (cobalamin deficiency) cblD type, with homocystinuria                | P236721                 | 0.67                 | 2.31E-04       |

(continued)



SUPPLEMENTARY TABLE S2. (CONTINUED)

| <i>Symbol</i> | <i>Protein name</i>                                                                | <i>Accession number</i> | <i>Fold over NTg</i> | <i>p-value</i> |
|---------------|------------------------------------------------------------------------------------|-------------------------|----------------------|----------------|
| ABCD3         | ATP-binding cassette, sub-family D (ALD), member 3                                 | P394395                 | 0.67                 | 1.54E-05       |
| USMG5         | Up-regulated during skeletal muscle growth 5 homolog (mouse)                       | P181365                 | 0.68                 | 3.78E-03       |
| C2ORF56       | Chromosome 2 open reading frame 56                                                 | P180826                 | 0.68                 | 6.56E-07       |
| ECSIT         | ECSIT homolog (Drosophila)                                                         | P348548                 | 0.68                 | 3.94E-05       |
| MRPL32        | Mitochondrial ribosomal protein L32                                                | P141818                 | 0.68                 | 2.28E-04       |
| BCAT2         | Branched chain aminotransferase 2, mitochondrial                                   | P448266                 | 0.68                 | 3.65E-05       |
| ECHDC3        | Enoyl Coenzyme A hydratase domain containing 3                                     | P475378                 | 0.68                 | 1.14E-03       |
| RNASET2       | Ribonuclease T2                                                                    | P477019                 | 0.68                 | 8.88E-06       |
| SLC25A33      | Solute carrier family 25, member 33                                                | P156434                 | 0.68                 | 1.86E-03       |
| SDHD          | Succinate dehydrogenase complex, subunit D, integral membrane protein              | P260871                 | 0.69                 | 1.31E-05       |
| MRPS31        | Mitochondrial ribosomal protein S31                                                | P319732                 | 0.69                 | 2.80E-05       |
| NDUFS8        | NADH dehydrogenase (ubiquinone) Fe-S protein 8, 23 kDa (NADH-coenzyme Q reductase) | P247441                 | 0.69                 | 6.35E-04       |
| TUSC3         | Tumor suppressor candidate 3                                                       | P515347                 | 0.69                 | 1.32E-03       |
| PARL          | Presenilin associated, rhomboid-like                                               | P247943                 | 0.69                 | 5.87E-05       |
| PDPR          | Pyruvate dehydrogenase phosphatase regulatory subunit                              | P137829                 | 0.69                 | 4.66E-04       |
| ABCE1         | ATP-binding cassette, sub-family E (OABP), member 1                                | P332822                 | 0.69                 | 9.62E-06       |
| COX6B2        | Cytochrome c oxidase subunit VIb polypeptide 2 (testis)                            | P300506                 | 0.69                 | 3.58E-04       |
| ACN9          | ACN9 homolog ( <i>S. cerevisiae</i> )                                              | P376337                 | 0.70                 | 6.36E-04       |
| RG9MTD1       | RNA (guanine-9-) methyltransferase domain containing 1                             | P301994                 | 0.70                 | 1.88E-04       |
| OXA1L         | Oxidase (cytochrome c) assembly 1-like                                             | P531829                 | 0.70                 | 3.27E-04       |
| MRPL49        | Mitochondrial ribosomal protein L49                                                | P261351                 | 0.70                 | 4.52E-06       |
| MTCP1         | Mature T-cell proliferation 1                                                      | P452280                 | 0.70                 | 6.41E-05       |
| TOMM40L       | Translocase of outer mitochondrial membrane 40 homolog (yeast)-like                | P86003                  | 0.70                 | 2.06E-04       |
| MRPL42        | Mitochondrial ribosomal protein L42                                                | P40367                  | 0.71                 | 1.11E-03       |
| GLRX2         | Glutaredoxin 2                                                                     | P514107                 | 0.71                 | 8.98E-04       |
